# Supplementary material for: Fin whale (Balaenoptera physalus) song pattern in the southern Chukchi Sea
Source: Springer Nature journal article supplement (doi:10.1007/s00300-021-02855-y), 2021-04-08
Supplement: MOESM1 [file 300_2021_2855_MOESM1_ESM.docx]

**Online Resource 1** The week in which the sequences of measured the inter pulse intervals was recorded in each year. I indicates the week with irregular sequences, S indicates the week with song sequences, gray area indicates the week with no pulses detected by the automatic detector, black area indicates the week with pulses detected by the automatic detector but no sequences (less than five consecutive pulses existed in an interval of 60 s or less) or no pulses when manually checked the selected data, and diagonal line area indicates the week outside the period of recording.

| Month/Year | June | July | August | | | | | September | | | | | October | | | | | November | |
| --- | --- | --- | --- | --- | --- | --- | --- | --- | --- | --- | --- | --- | --- | --- | --- | --- | --- | --- | --- |
| Week No. | 1 | 1 | 1 | 2 | 3 | 4 | 5 | 1 | 2 | 3 | 4 | 5 | 1 | 2 | 3 | 4 | 5 | 1 | 2 |
| 2012 |  |  |  | I | I | I |  | I | S | S | S | S | S |  | I |  |  |  |  |
| 2013 |  | I | I | S |  | S |  | S | S | I | S | I | I | S | S | S |  | S |  |
| 2014 |  | I | I | I | I | S | S |  | S | S |  |  | S |  | S |  | S | S | S |
| 2015 | I |  |  |  |  |  |  |  |  |  |  |  |  |  |  |  |  |  |  |
