# Supplementary material for: Fin whale (Balaenoptera physalus) song pattern in the southern Chukchi Sea
Source: Springer Nature journal article supplement (doi:10.1007/s00300-021-02855-y), 2021-04-08
Supplement: MOESM2 [file 300_2021_2855_MOESM2_ESM.docx]

**Online Resource 2** Fin whale (*Balaenoptera physalus*) doublet and triplet songs in the North Pacific from this study and previous studies (Delarue et al. 2013; Oleson et al. 2014; Koot 2015; Sugioka et al. 2016; Širović et al. 2017; Berchok Unpubl.). D indicates a doublet and T indicates a triplet. The numbers after D/T indicate IPIs. D-10/20 and D-20/30 are Type 2 doublet and Type1 doublet, respectively, following Koot (2015).

| **Year/Area** | **– 2006** | **2007 – 2011** | **2012 –** |
| --- | --- | --- | --- |
| **Northeastern Chukchi Sea** | - | T- 8/15/20  (Delarue et al. 2013) | D-10/20 (Type 2)  (Berchok, unpubl. Data) |
| **Southern Chukchi Sea** | - | - | D-10/20 (Type 2)  (this study) |
| **Bering Sea** | D-20/30 (Type 1)  (Delarue et al. 2013; Oleson et al. 2014) | T-8/15/20  (Delarue et al. 2013) | - |
| **Western North Pacific** | - | - | D-20/30 (Type 1)  (Sugioka et al. 2013) |
| **Central Pacific** | D-20/30 (Type 1)  (Oleson et al. 2014) | - | - |
| **Eastern North Pacific** | D-10/20 (Type 2) • D-20/30 (Type 1) • T-5/5/10  (Koot 2015; Oleson et al. 2014; Širović et al. 2017) | D-10/20 (Type 2) • D-20/30 (Type 1) • D-15/20 • T-5/5/20  (Koot 2015; Oleson et al. 2014; Širović et al. 2017) | D-10/20 (Type 2) • D-20/30 (Type 1)  (Koot 2015; Oleson et al. 2014) |
