# Supplementary material for: Fin whale (Balaenoptera physalus) song pattern in the southern Chukchi Sea
Source: Springer Nature journal article supplement (doi:10.1007/s00300-021-02855-y), 2021-04-08
Supplement: MOESM3 [file 300_2021_2855_MOESM3_ESM.docx]

**Table S3** The intra-annual differences in inter-pulse intervals. Results of one-way ANOVA. IPI_BC indicates an inter-pulse interval (IPI) with backbeat (B) followed by classic (C), and IPI_CB indicates an IPI with C followed by B.

|  |  | **IPI_BC** | | **IPI_CB** | |
| --- | --- | --- | --- | --- | --- |
| **Year** | **DF** | **F Statistic** | **p-value** | **F Statistic** | **p-value** |
| 2012 | 4 | 10.3038 | <0.0001* | 3.3227 | 0.011 |
| 2013 | 8 | 7.0557 | <0.0001* | 3.2337 | 0.001 |
| 2014 | 7 | 77.2928 | <0.0001* | 4.6004 | <0.0001* |

* α < 0.05
