# Supplementary material for: Fin whale (Balaenoptera physalus) song pattern in the southern Chukchi Sea
Source: Springer Nature journal article supplement (doi:10.1007/s00300-021-02855-y), 2021-04-08
Supplement: MOESM4 [file 300_2021_2855_MOESM4_ESM.docx]

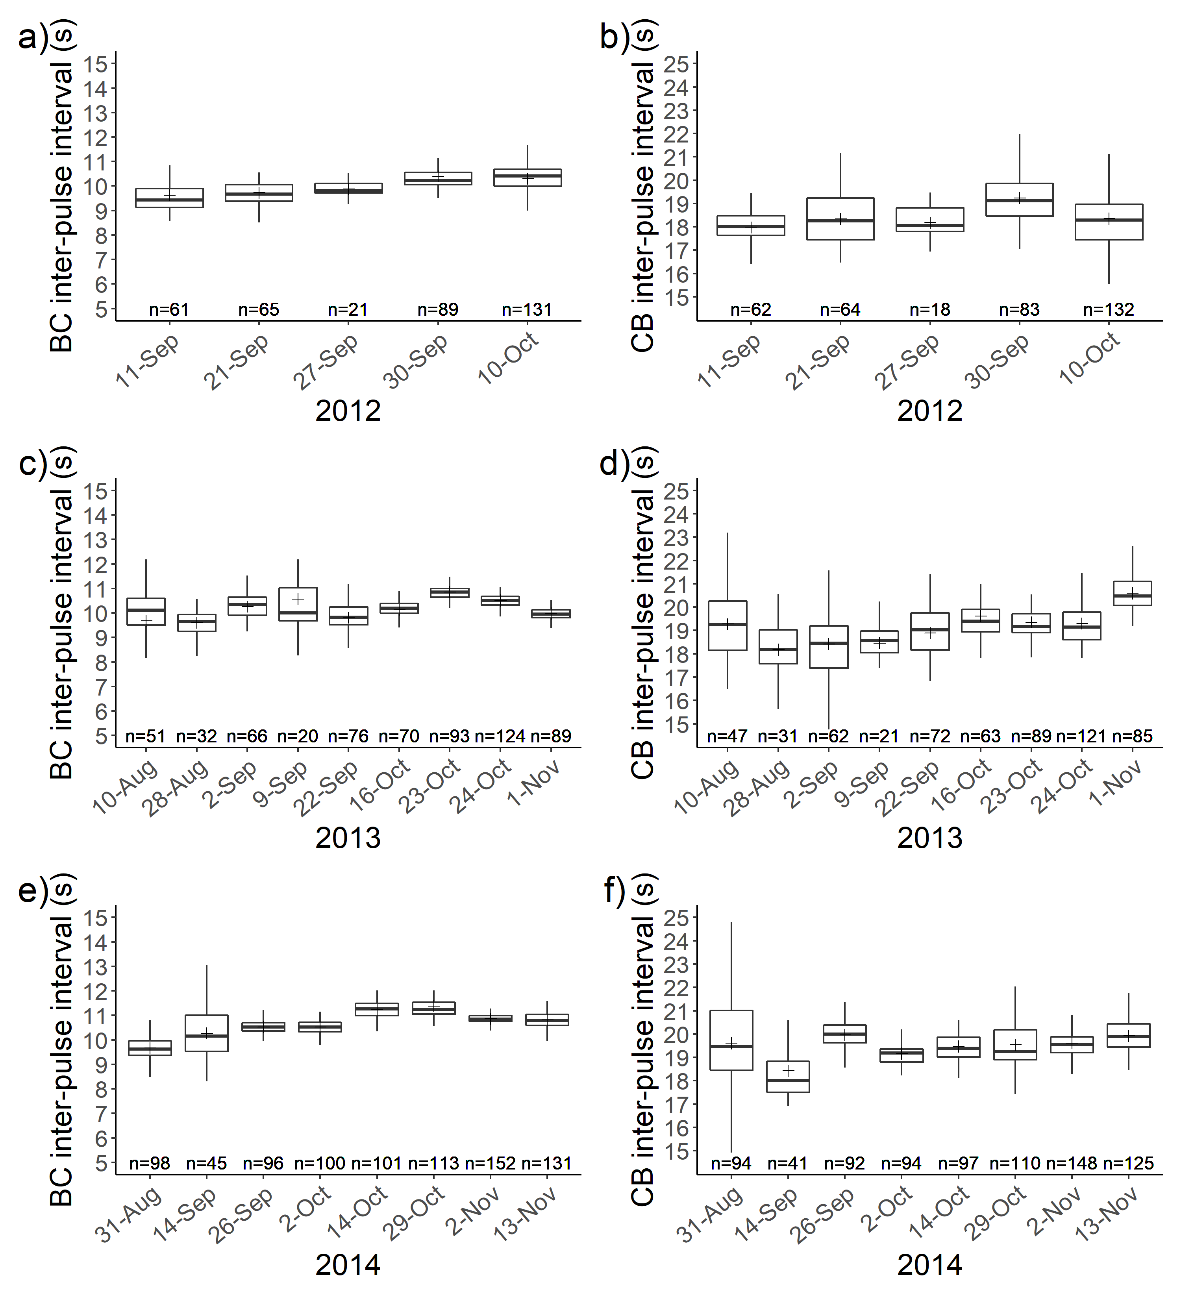


**Online Resource 4** The intra-annual differences in (a) IPI_BC in 2012, in which backbeat (B) is followed by classic (C), (b) IPI_CB in 2012, in which C is followed by B, (c) IPI_BC in 2013, (d) IPI_CB in 2013, (e) IPI_BC in 2014, and (f) IPI_CB in 2014 of fin whale doublet songs recorded in the southern Chukchi Sea from 2012 to 2014. Y-axis is inter-pulse interval in seconds and x-axis is recording date. Boxes indicate the interquartile range (25–75th %), whiskers represent 1.5× interquartile range, horizontal bars in the boxes indicate the median, and cross marks indicate the mean.
